# Supplementary material for: Structures of catechol(H2O)1,3 clusters in the S0 and D0 states
Source: Royal Society of Chemistry journal article supplement (doi:10.1039/b006744j), 2000-01-01
Supplement: esi.doc [file esi.doc]

Table S1:

Structural parameters of catechol(H2O)1 in the S0 and D0 states (basis set: 6-31G(d,p)).

The numbering of the atoms is given in Figure 1b of the paper. Angle j describes the deviation of the hydrogen bond from linearity. b is the angle between the plane of the water molecule and the O(2)××O(3) axis (see also Ref 4 of the paper).

|  | S0 | | D0 | |
| --- | --- | --- | --- | --- |
|  | HF [4] | MP2 | ROHF | UMP2 |
| *bond lengths [Å]* |  |  |  |  |
| O(1)-O(2) | 2.660 | 2.658 | 2.624 | 2.618 |
| O(2)-O(3) | 2.880 | 2.795 | 2.659 | 2.555 |
| O(1)-C(1) | 1.350 | 1.369 | 1.293 | 1.316 |
| O(1)-H | 0.945 | 0.969 | 0.951 | 0.977 |
| O(2)-C(2) | 1.355 | 1.374 | 1.293 | 1.310 |
| O(2)-H | 0.950 | 0.976 | 0.972 | 1.019 |
| O(3)-H | 0.944 | 0.963 | 0.946 | 0.966 |
| *bond angles [°]* |  |  |  |  |
| C(1)-O(1)-H | 108.92 | 105.81 | 113.21 | 109.92 |
| C(2)-O(2)-H | 112.05 | 109.59 | 115.40 | 113.47 |
| H-O(3)-H | 107.02 | 105.18 | 107.06 | 106.04 |
| O(1)-C(1)-C(6) | 119.99 | 120.25 | 119.84 | 120.27 |
| O(2)-C(2)-C(1) | 115.61 | 114.63 | 114.42 | 113.61 |
|  |  |  |  |  |
| j (O(3)-O(2)-H) | 1.46 | 0.70 | 1.97 | 2.23 |
|  |  |  |  |  |
| ### | 145.89 | 131.81 | 154.01 | 145.54 |
|  |  |  |  |  |

Tab. S2a: Structural parameters of cyclic and p-bonded catechol(H2O)3, for numbering see Figure 1c,d. In the case of the DFT calculations the B3LYP functional is used (basis sets 6-31G(d,p)).

|  | cyclic | | | p-bonded | | |  |
| --- | --- | --- | --- | --- | --- | --- | --- |
|  | HF | MP2 | DFT | HF | MP2 | DFT |  |
| *bond lengths [Å]* |  |  |  |  |  |  |  |
| O(1)-H | 0.948 | 0.975 | 0.980 | 0.946 | 0.971 | 0.944 |  |
| O(2)-H | 0.958 | 0.994 | 0.997 | 0.956 | 0.992 | 0.975 |  |
| O(2)...H | 2.136 | 2.022 | 2.058 | 2.139 | 2.058 | 2.107 |  |
| O(3)-Hb | 0.955 | 0.985 | 0.992 | 0.956 | 0.985 | 0.992 |  |
| O(3)-Hf | 0.943 | 0.962 | 0.968 | 0.943 | 0.962 | 0.969 |  |
| O(3)...H | 1.823 | 1.951 | 1.706 | 1.836 | 1.684 | 1.721 |  |
| O(4)-Hb | 0.954 | 0.980 | 0.989 | 0.953 | 0.980 | 0.988 |  |
| O(4)-Hf | 0.943 | 0.962 | 0.969 | 0.943 | 0.962 | 0.969 |  |
| O(4)...Hb | 1.868 | 1.726 | 1.747 | 1.867 | 1.725 | 1.748 |  |
| O(5)-Hb | 0.950 | 0.985 | 0.984 | 0.947 | 0.968 | 0.977 |  |
| O(5)-Hf | 0.943 | 0.962 | 0.969 | 0.944 | 0.964 | 0.970 |  |
| O(5)...Hb | 1.903 | 1.789 | 1.774 | 1.918 | 1.793 | 1.782 |  |
| O(2)-C(2) | 1.357 | 1.369 | 1.374 | 1.350 | 1.364 | 1.364 |  |
| O(1)-C(1) | 1.360 | 1.381 | 1.382 | 1.348 | 1.366 | 1.365 |  |
| O(1)-O(5) | 2.951 | 2.877 | 2.832 | 4.450 | 4.139 | 5.028 |  |
| O(5)-O(4) | 2.856 | 2.767 | 2.763 | 2.867 | 2.771 | 2.766 |  |
| O(4)-O(3) | 2.820 | 2.708 | 2.737 | 2.818 | 2.707 | 2.735 |  |
| O(3)-O(2) | 2.764 | 2.636 | 2.689 | 2.782 | 2.623 | 2.712 |  |
| O(2)-O(1) | 2.665 | 2.634 | 2.654 | 2.659 | 2.649 | 2.664 |  |
| *bond angles [°]* |  |  |  |  |  |  |  |
| j1[O(3)-O(2)-H] | 8,83 | 8.98 | 7.34 | 7.00 | 7.37 | 4.04 |  |
| j2[O(4)-O(3)-Hb] | 4.27 | 3.92 | 2.76 | 5.00 | 3.92 | 4.73 |  |
| j3[O(5)-O(4)-Hb] | 2.07 | 2.22 | 1.40 | 4.40 | 2.83 | 4.11 |  |
| j4[O(1)-O(5)-Hb] | 10.84 | 14.39 | 7.56 | -- | -- | -- |  |
| C(1)-O(1)-H | 107.63 | 104.18 | 105.24 | 108.73 | 105.40 | 107.41 |  |
| C(2)-O(2)-H | 110.90 | 108.89 | 111.03 | 111.55 | 108.91 | 111.73 |  |
| O(2)-C(2)-C(1) | 116.65 | 114.97 | 115.77 | 115.81 | 114.78 | 115.17 |  |
| C(6)-C(1)-O(1) | 120.09 | 120.57 | 120.79 | 120.00 | 120.40 | 120.21 |  |
| C(2)-C(1)-O(1) | 119.25 | 118.06 | 118.11 | 120.00 | 119.24 | 119.58 |  |
| Hb-O(3)-Hf | 106.41 | 104.85 | 106.23 | 106.85 | 105.20 | 106.44 |  |
| Hb-O(3) ...H | 107.32 | 100.58 | 107.49 | 107.83 | 101.81 | 109.69 |  |
| Hb-O(4)-Hf | 106.35 | 104.57 | 106.00 | 106.35 | 104.43 | 106.00 |  |
| Hb-O(4) ...Hb | 119.45 | 114.80 | 114.88 | 112.11 | 113.34 | 109.85 |  |
| Hb-O(5)-Hf | 106.16 | 103.14 | 106.32 | 105.48 | 103.28 | 105.49 |  |
| Hb-O(5) ...Hb | 114.65 | 113.75 | 113.25 | 109.64 | 107.92 | 116.77 |  |
| *dihedral angles [°]* |  |  |  |  |  |  |  |
| O(1)-O(2)-O(3)-O(4) | 8.43 | -1.28 | 7.42 | -5.42 | 0.97 | -4.97 |  |
| O(2)-O(3)-O(4)-O(5) | -13.43 | -3.88 | -9.84 | -24.96 | -26.37 | -30.25 |  |
| O(3)-O(4)-O(5)-O(1) | 13.92 | 7.28 | 9.11 | 32.28 | 33.50 | 33.50 |  |
| O(4)-O(5)-O(1)-O(2) | -7.92 | -6.19 | -4.07 | -25.03 | -23.16 | -26.01 |  |
| t1[H-O(2)-C(2)-C(3)] | 57.52 | 41.26 | 60.89 | 23.39 | 20.65 | 14.23 |  |
| t2[H-O(1)-C(1)-C(2)] | -10.45 | -9.34 | -9.29 | -1.55 | -1.67 | -0.36 |  |

Table S2b:

Structural parameters of cyclic and p-bonded phenol(H2O)3, for numbering see Figure 1e,f. (6-31G(d,p) basis set).

|  | cyclic | | p-bonded | |
| --- | --- | --- | --- | --- |
|  | HF | MP2 | HF | MP2 |
| *bond lengths [Å]* |  |  |  |  |
| O(1)-H | 0.957 | 0.991 | 0.954 | 0.986 |
| O(2)...H | 1.838 | 1.700 | 1.873 | 1.738 |
| O(2)-Hb | 0.955 | 0.985 | 0.955 | 0.984 |
| O(2)-Hf | 0.943 | 0.962 | 0.943 | 0.963 |
| O(3)...Hb | 1.890 | 1.749 | 1.877 | 1.742 |
| O(3)-Hb | 0.954 | 0.982 | 0.953 | 0.979 |
| O(3)-Hf | 0.943 | 0.962 | 0.943 | 0.962 |
| O(4)...Hb | 1.903 | 1.778 | 1.927 | 1.808 |
| O(4)-Hb | 0.951 | 0.976 | 0.947 | 0.968 |
| O(4)-Hf | 0.943 | 0.963 | 0.944 | 0.964 |
| O(1)-C(1) | 1.352 | 1.376 | 1.338 | 1.355 |
| O(1)-O(4) | 2.912 | 2.789 | 3.954 | 3.945 |
| O(4)-O(3) | 2.842 | 2.746 | 2.873 | 2.785 |
| O(3)-O(2) | 2.822 | 2.717 | 2.824 | 2.722 |
| O(2)-O(1) | 2.784 | 2.680 | 2.815 | 2.710 |
| *bond angles [°]* |  |  |  |  |
| j1[O(2)-O(1)-H] | 7.10 | 6.93 | 7.19 | 7.91 |
| j2[O(3)-O(2)-Hb] | 10.30 | 8.40 | 5.97 | 4.07 |
| j3[O(4)-O(3)-Hb] | 8.38 | 7.59 | 5.67 | 2.60 |
| j4[O(1)-O(4)-Hb] | 12.12 | 12.10 | -- | -- |
| C(1)-O(1)-H | 111.92 | 109.38 | 111.75 | 108.83 |
| O(1)-C(1)-C(2) | 122.00 | 122.43 | 122.65 | 122.98 |
| Hb-O(2)-Hf | 107.05 | 105.85 | 106.81 | 105.02 |
| Hb-O(2) ...H | 105.69 | 102.91 | 106.24 | 100.27 |
| Hb-O(3)-Hf | 106.54 | 104.59 | 106.46 | 104.56 |
| Hb-O(3) ...Hb | 103.07 | 102.67 | 109.46 | 112.90 |
| Hb-O(4)-Hf | 106.19 | 103.74 | 105.22 | 102.60 |
| Hb-O(4) ...Hb | 103.55 | 99.87 | 108.03 | 106.30 |
| *dihedral angles [°]* |  |  |  |  |
| O(1)-O(2)-O(3)-O(4) | -1.85 | 1.26 | -25.38 | -25.96 |
| t1[H-O(1)-C(1)-C(2)] | -4.79 | 2.67 | 10.25 | 12.44 |
